# Supplementary material
Source: Springer Nature journal article supplement (https://www.springermedizin.de/resource/supplementary/12991_2005_199_MOESM2_ESM.pdf/9613920)

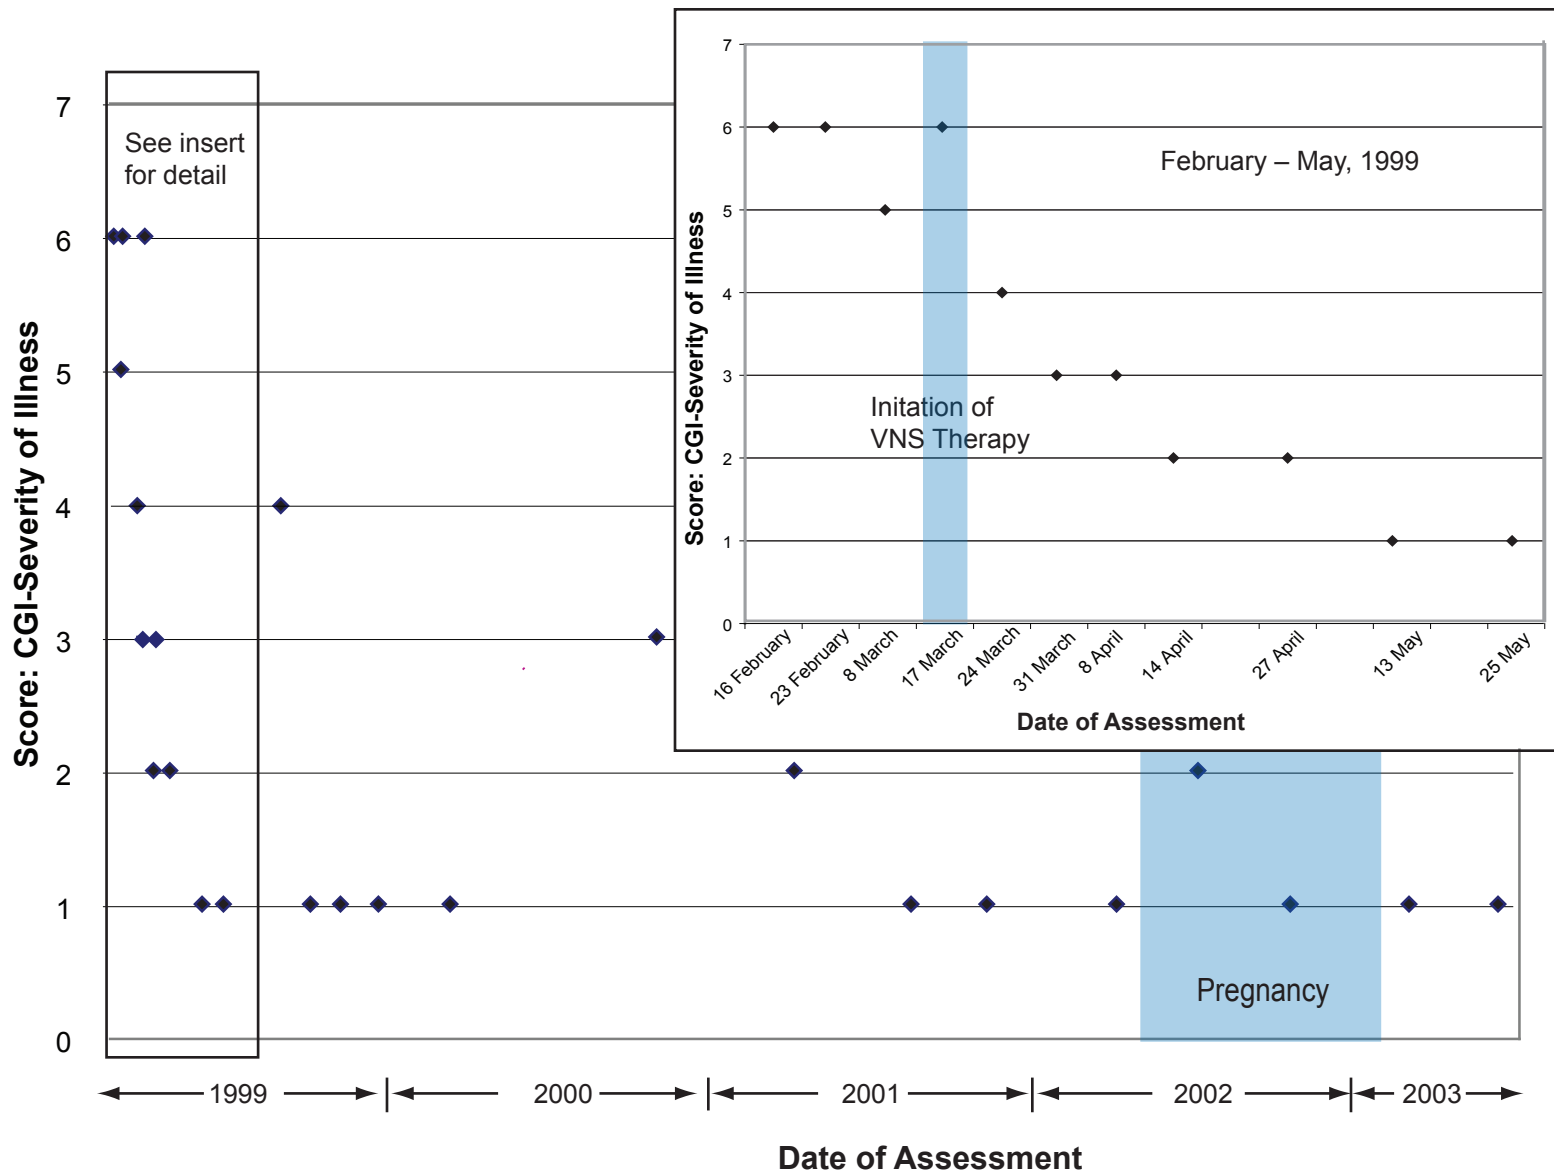

Supplement: MOESM2 [file 9613920]
